# Supplementary material
Source: Springer Nature journal article supplement (https://www.springermedizin.de/resource/supplementary/12888_2013_1521_MOESM1_ESM.pdf/9481234)
Supplement: MOESM1 [file 9481234]

500 Primary Care Practices in the City of Hamburg Invited

20 Primary Care Practices Participate

Randomization

10 Practices Intervention Group

10 Practices Control Group

Identifying patients with a score of  $\geq 5$  on the anxiety, depression or somatoform scale on the PHQ-D

Up to 25 patients potentially eligible

Up to 25 patients potentially eligible

17 patients in collaborative care by an APN, 8 patients reject

17 patients in usual care by their GP, 8 patients reject

Baseline Assessment

Follow-Up 1 - 8 weeks post-baseline

Follow-Up 2 - 12 months post-baseline

11 patients in collaborative care by an APN, 6 dropouts

11 patients in usual care by their GP, 6 dropouts
